# Supplementary material
Source: publisher figshare collection journal article supplement (https://acs.figshare.com/ndownloader/files/4714837)
Supplement: Supplementary file 1 [file 4714837]

## Supporting Information for

# Coupling of Functional Hydrogen Bonds in Pyridoxal-5'-phosphate-Enzyme Model Systems Observed by Solid State NMR

Shasad Sharif,<sup>‡</sup> David Schagen,<sup>‡</sup> Michael D. Toney,<sup>†</sup> and Hans-Heinrich Limbach<sup>‡\*</sup>

<sup>‡</sup> Institut für Chemie, Freie Universität Berlin, Takustraße 3, D-14195 Berlin, Germany

<sup>†</sup> Department of Chemistry, University of California-Davis, 95616 Davis, United States

---

### Table of Contents

---

|                   |                                                                                                                                                                                                                                                                                                                                                                               |            |
|-------------------|-------------------------------------------------------------------------------------------------------------------------------------------------------------------------------------------------------------------------------------------------------------------------------------------------------------------------------------------------------------------------------|------------|
| <b>Figure S1.</b> | Superposed experimental and calculated 30.41 MHz $^{15}\text{N}\{^1\text{H}\}$ CP NMR static spectra solid powder samples of the aldenamine Schiff base and its 1 : 1 acid base complexes of, <b>1b</b> , <b>1g</b> , <b>1i</b> , <b>1j</b> and deuterated <b>1g-d</b> , <b>1i-d</b> , <b>1j-d</b> . Also presented is the theory of Dipolar $^{15}\text{N}$ Solid State NMR. | <b>S2</b>  |
| <b>Figure S2.</b> | $^{15}\text{N}\{^1\text{H}\}$ CP MAS (30.41 MHz, 6 kHz) spectra of the aldimine Schiff base ( <b>2a</b> ), and its 1 : 1 acid-base complex <b>2a</b> -4-nitrobenzoic acid ( <b>2c</b> ).                                                                                                                                                                                      | <b>S5</b>  |
| <b>Figure S3.</b> | $^{15}\text{N}\{^1\text{H}\}$ CP MAS (30.41 MHz, 6 kHz) spectra of $^{15}\text{N}$ labeled pyridoxal-5'-phosphate (PLP), and its derivative pyridoxal (PL) in natural abundance. Also presented are the crystallographic structures.                                                                                                                                          | <b>S6</b>  |
| <b>Figure S4.</b> | $^{15}\text{N}\{^1\text{H}\}$ CP MAS (30.41 MHz, 6 kHz) spectra of $^{15}\text{N}$ labeled pyridoxine (PN), pyridoxine hydrochloride (PN·HCl). Also presented are the crystallographic structures.                                                                                                                                                                            | <b>S7</b>  |
| <b>Figure S5.</b> | $^{15}\text{N}\{^1\text{H}\}$ CP MAS (30.41 MHz, 6 kHz) spectra of $^{15}\text{N}$ labeled in imino position pyridoxamine (PM) and pyridoxamine dihydrochloride (PN·2HCl) in natural abundance. Also presented are the crystallographic structures.                                                                                                                           | <b>S8</b>  |
| <b>Figure S6.</b> | Plot of the estimated intramolecular $r_{\text{NH}}$ distances against the intrinsic $^{15}\text{N}$ chemical shift of the imino nitrogen.                                                                                                                                                                                                                                    | <b>S9</b>  |
| <b>Figure S7.</b> | Secondary isotopic effect $^1\Delta\text{N1(D)}$ vs. intrinsic $^{15}\text{N}$ chemical shift.                                                                                                                                                                                                                                                                                | <b>S10</b> |
| <b>Figure S8.</b> | $\text{pK}_a$ values vs. proton transfer coordinate $q_1^{\text{H}}$ correlation. In addition are also listed the estimated geometrical parameters                                                                                                                                                                                                                            | <b>S11</b> |

---

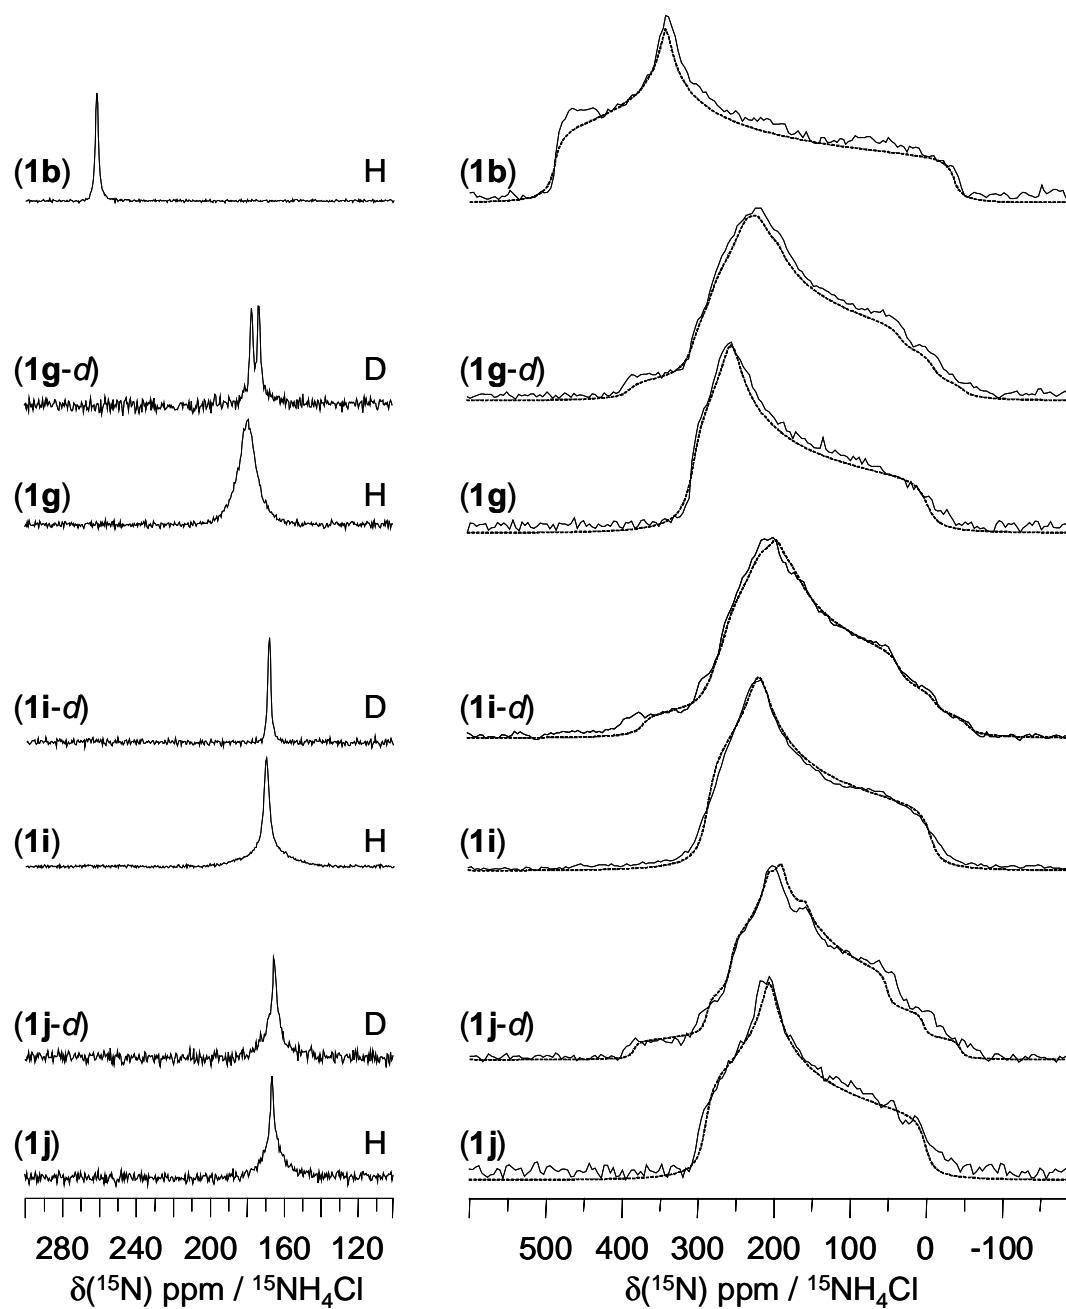

**Figure S1.** Superposed experimental and calculated 30.41 MHz  $^{15}\text{N}\{^1\text{H}\}$  CP NMR static spectra solid powder samples of the aldenamine Schiff base and its 1 : 1 acid-base complexes of, **1b**, **1g**, **1i**, **1j** and deuterated **1g-d**, **1i-d**, **1j-d**, at room temperature. Additionally the MAS spectra of the mentioned samples are shown.

## Determination of N...H/N...D - Distances by Dipolar $^{15}\text{N}$ Solid State NMR

The NMR theory of heteronuclear dipolar coupling<sup>1,2,3</sup> between  $^{15}\text{N}$  nuclei and a deuteron has been described previously.<sup>4,5</sup> The N...L - Distances, with L = H, D, are calculated from the dipolar frequency of  $\nu_{\text{d}}^{\text{NL}} = D^{\text{NL}} (1-3\cos^2 \theta_{\text{d}}^{\text{NL}})$  is the dipolar coupling constant  $D^{\text{NL}}$  given by

$$\nu_{\text{d}}^{\text{NL}} = D^{\text{NL}} (1-3\cos^2 \theta_{\text{d}}^{\text{NL}}), \quad D^{\text{NL}} = \frac{\gamma^{\text{N}} \gamma^{\text{L}} h \mu_0}{16\pi^3 r_{\text{c}}^3(\text{NL})}. \quad (1)$$

$\gamma^{\text{N}}$  and  $\gamma^{\text{L}}$  are the gyromagnetic ratios of the two nuclei,  $h$  Planck's constant,  $\mu_0$  the magnetic permeability.  $r_{\text{c}}(\text{NL})$  represents the average reversal cubic internuclear distance N...L in expression in Å  
 $D^{\text{NH}} = 12158 r_{\text{c}}^{-3}(\text{NH})$  [Hz], and  $D^{\text{ND}} = 1868 r_{\text{c}}^{-3}(\text{ND})$  [Hz]. (2)

$\theta_{\text{d}}^{\text{NL}}$  is the angle between the magnetic field and the vector NL. This angle can more conveniently be described by the Euler angles in the coordinate system of the CSA tensor -  $\phi^{\text{B}}$  and  $\theta^{\text{B}}$  for the magnetic field and  $\alpha_{\text{d}}^{\text{NL}}$  and  $\beta_{\text{d}}^{\text{NL}}$  for the vector NL, respectively. It can be shown that

- 
- (1) Mehring M. In *NMR Basic Principles and Progress* **11**, High Resolution NMR in Solids, Springer: Berlin-Heidelberg-New York, 1978.
  - (2) Seth, N. K.; Alderman, D. W.; Grant, D. M. *Mol. Phys.* **1990**, *71*, 217-238.
  - (3) Zilm, K. W.; Grant, D. M. *J. Am. Chem. Soc.* **1981**, *103*, 2913-2922.
  - (4) Lorente, P.; Shenderovich, I. G.; Golubev, N. S.; Denisov, G. S.; Buntkowsky, G.; Limbach, H.-H. *Magn. Reson. Chem.* **2001**, *39*, 18-29.
  - (5) Hoelger, C.-G.; Limbach, H.-H. *J. Phys. Chem.* 1994, *98*, 11803-11810.

$$\cos \theta_d^{NL} = \sin \beta_d^{NL} \sin \theta^B \cos(\phi^B - \alpha_d^{NL}) + \cos \beta_d^{NL} \cos \theta^B. \quad (3)$$

The  $^{15}\text{N}$  NMR spectrum of a polycrystalline powder is obtained from eqs. (1) - (3) by calculating  $\nu^N$  for all possible orientations by variation of  $\phi^B$  and  $\theta^B$  using increments of 1-2°. For statistical reasons the signal intensity has to be weighted by a factor of  $\sin \theta^B$ .

Experimentally, only relative chemical shifts  $\delta_{ii} = \delta_{\text{ref}} - \delta_{ii}$ ,  $ii = XX, YY, ZZ$  which are measured with respect to some standard reference, can be obtained. For the determination of the  $^{15}\text{N}\dots\text{D}$  distances first the elements of the  $^{15}\text{N}$  CSA tensor are determined by simulating the experimental solid state  $^{15}\text{N}$  NMR spectrum of the protonated system, *i. e.*  $\text{L} = \text{H}$ , under proton decoupling. The values obtained are then corrected for H/D isotope effects on the elements of the  $^{15}\text{N}$  CSA tensor. The new values have been used for a simulation of the proton decoupled  $^{15}\text{N}$  NMR spectrum of the species deuterated in the hydrogen bond, by adapting the remaining parameters  $\alpha_d^{\text{ND}}$ ,  $\beta_d^{\text{ND}}$  and  $D^{\text{ND}}$ . The determination of the  $^{15}\text{N}\dots\text{H}$  distances more difficult.<sup>4</sup> Hence, we could obtain the distances  $\text{N}\dots\text{H}$  by extrapolation from the observed strong dependence of the  $\text{N}\dots\text{D}$  distances on the isotropic chemical shifts.

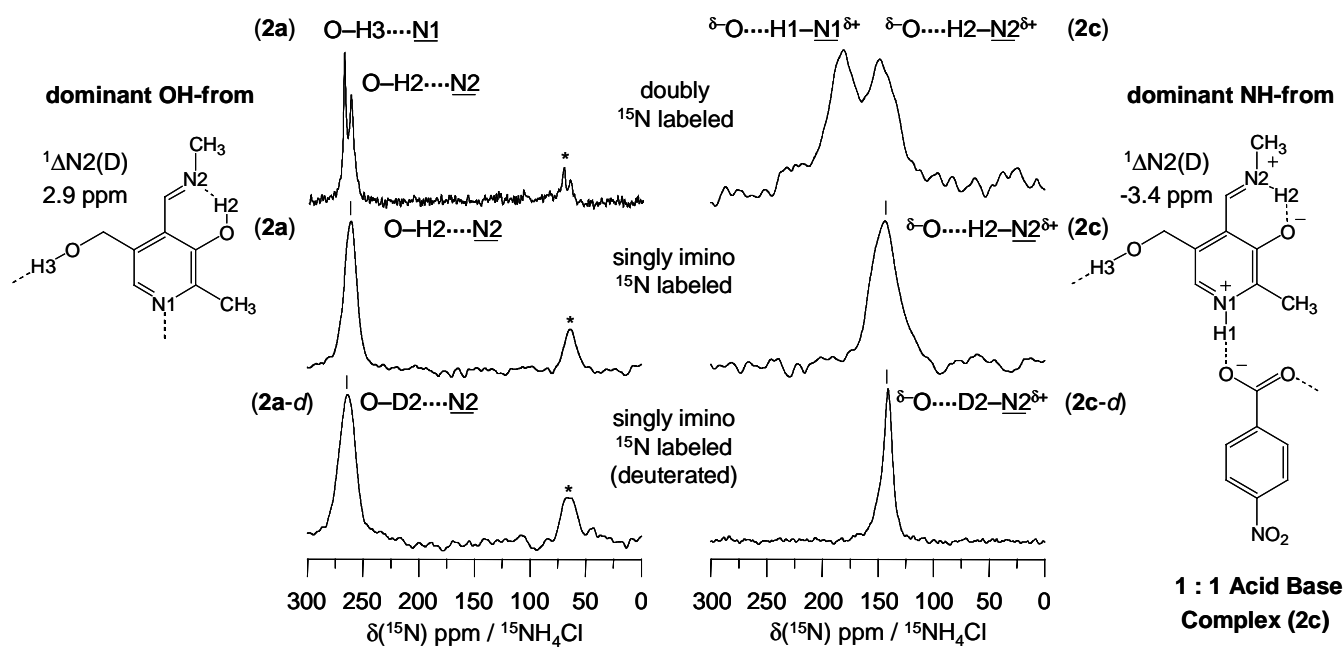

**Figure S2.**  $^{15}\text{N}\{^1\text{H}\}$  CP MAS (30.41 MHz, 6 kHz) spectra of the aldimine Schiff base (**2a**), and its 1 : 1 acid-base complex **2a**-4-nitrobenzoic acid (**2c**). From the top of the figure are shown the  $^{15}\text{N}$  labeled doubly, selectively imino, and the selectively imino of the deuterated compounds **2a-d** and **2c-d**. \*: spinning sideband.

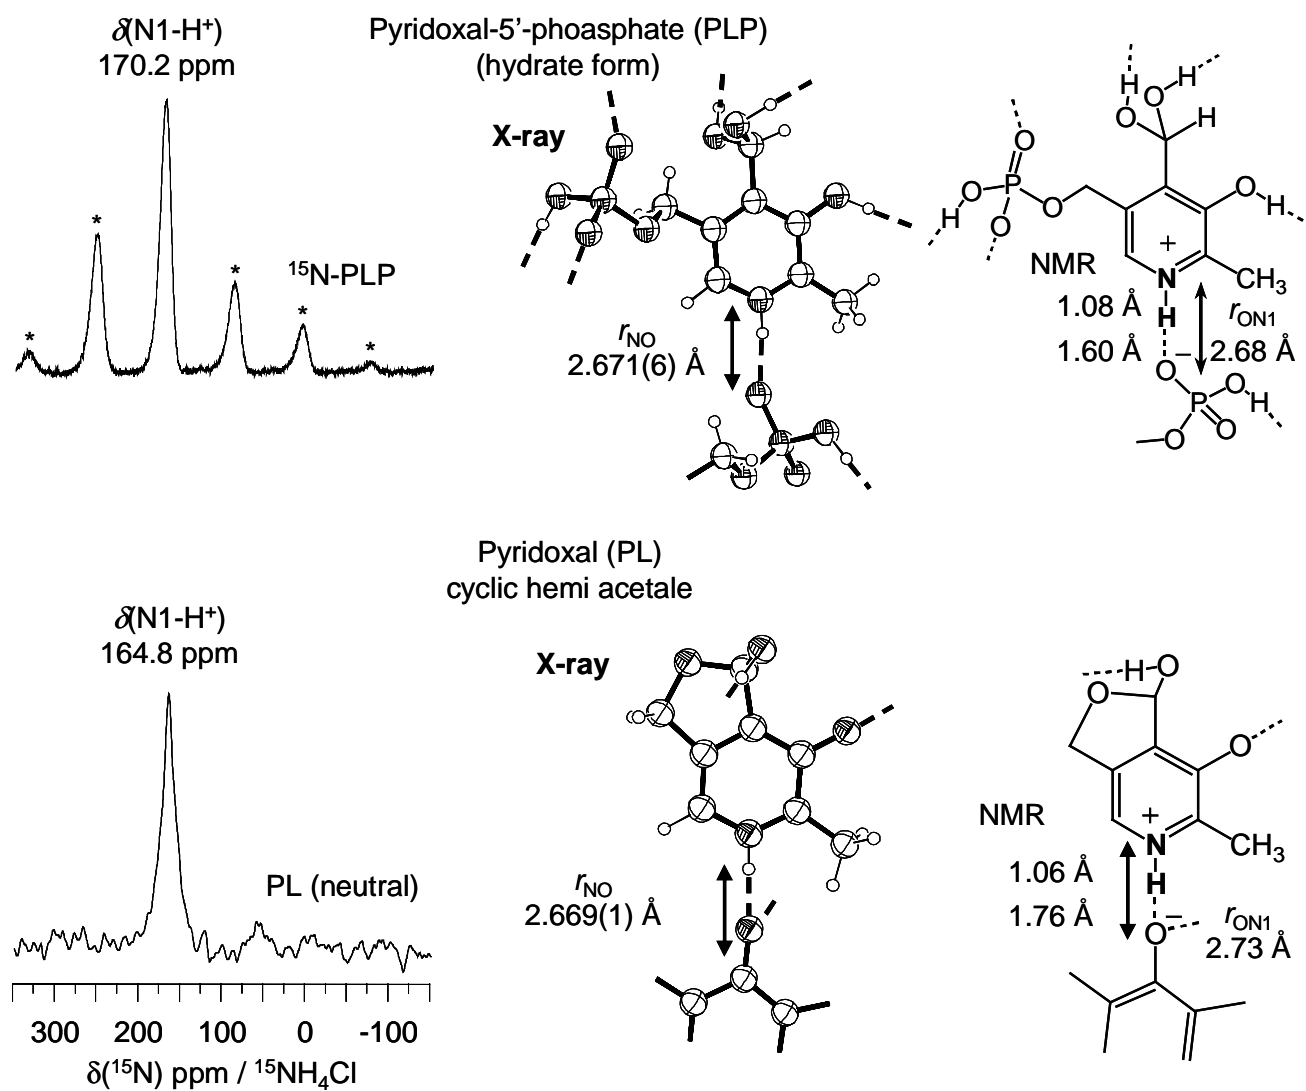

**Figure S3.**  $^{15}\text{N}\{^1\text{H}\}$  CP MAS (30.41 MHz, 6 kHz) spectra of  $^{15}\text{N}$  labeled pyridoxal-5'-phosphate (PLP), and its derivative pyridoxal (PL) in natural abundance. For the presented crystallographic structures and values see text. The spectra of  $^{15}\text{N}$  labeled (PLP) is obtained at 60.8 MHz with a spinning speed of 5 kHz. \*: spinning sidebands.

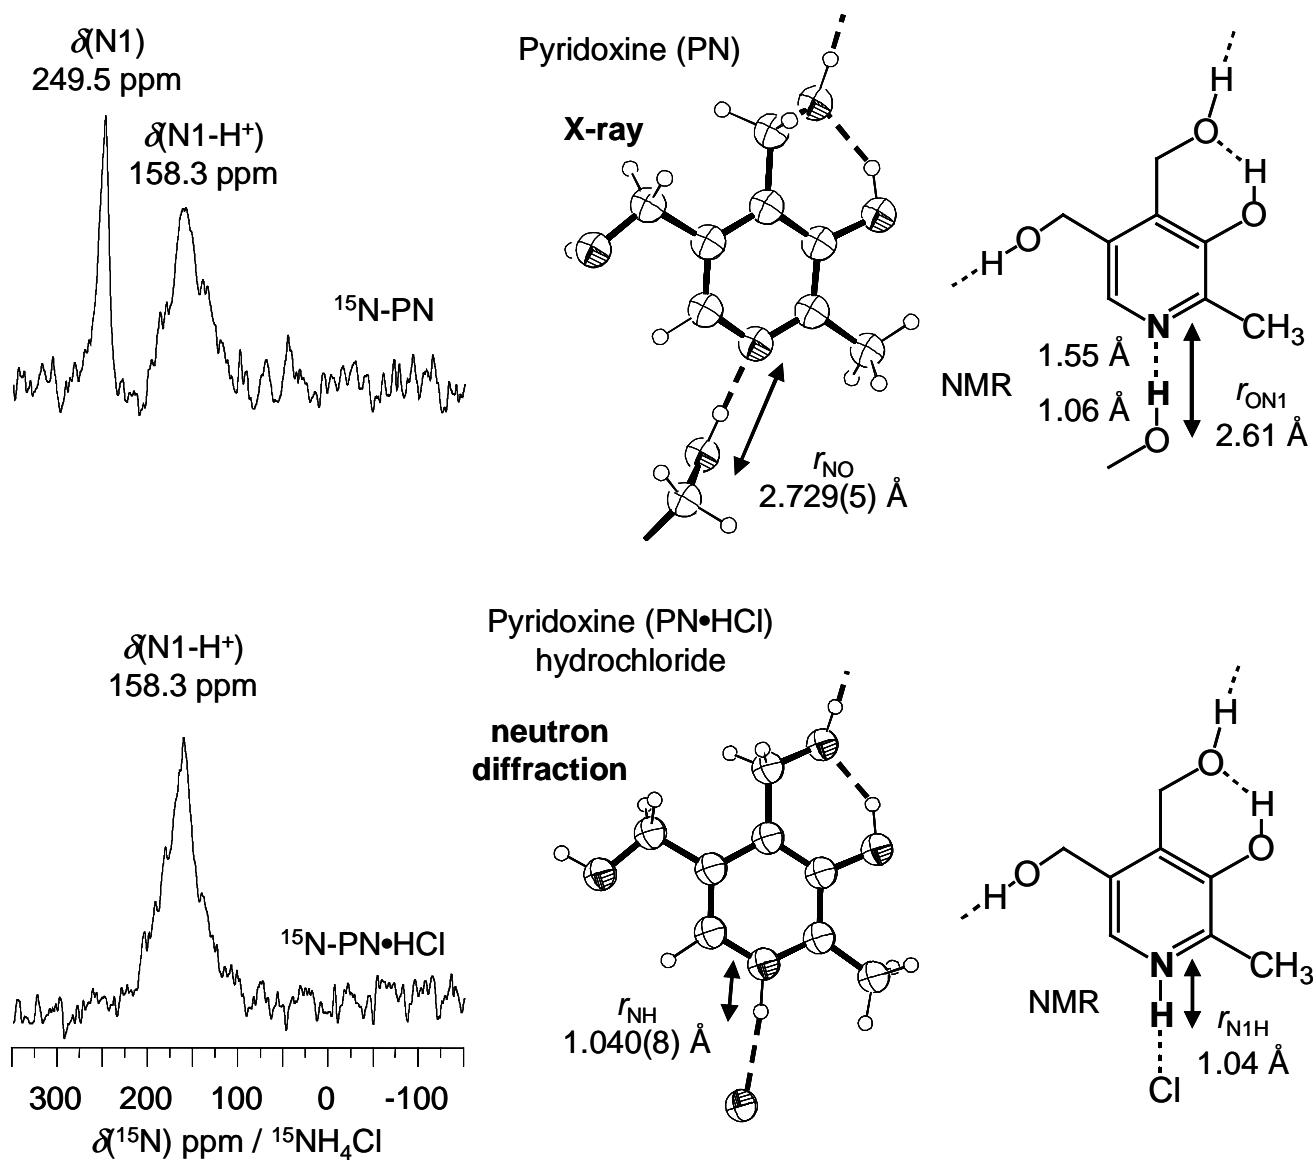

**Figure S4.**  $^{15}\text{N}$   $\{^1\text{H}\}$  CP MAS (30.41 MHz, 6 kHz) spectra of  $^{15}\text{N}$  labeled pyridoxine (PN), pyridoxine hydrochloride (PN·HCl). For the presented crystallographic structures and values see text.

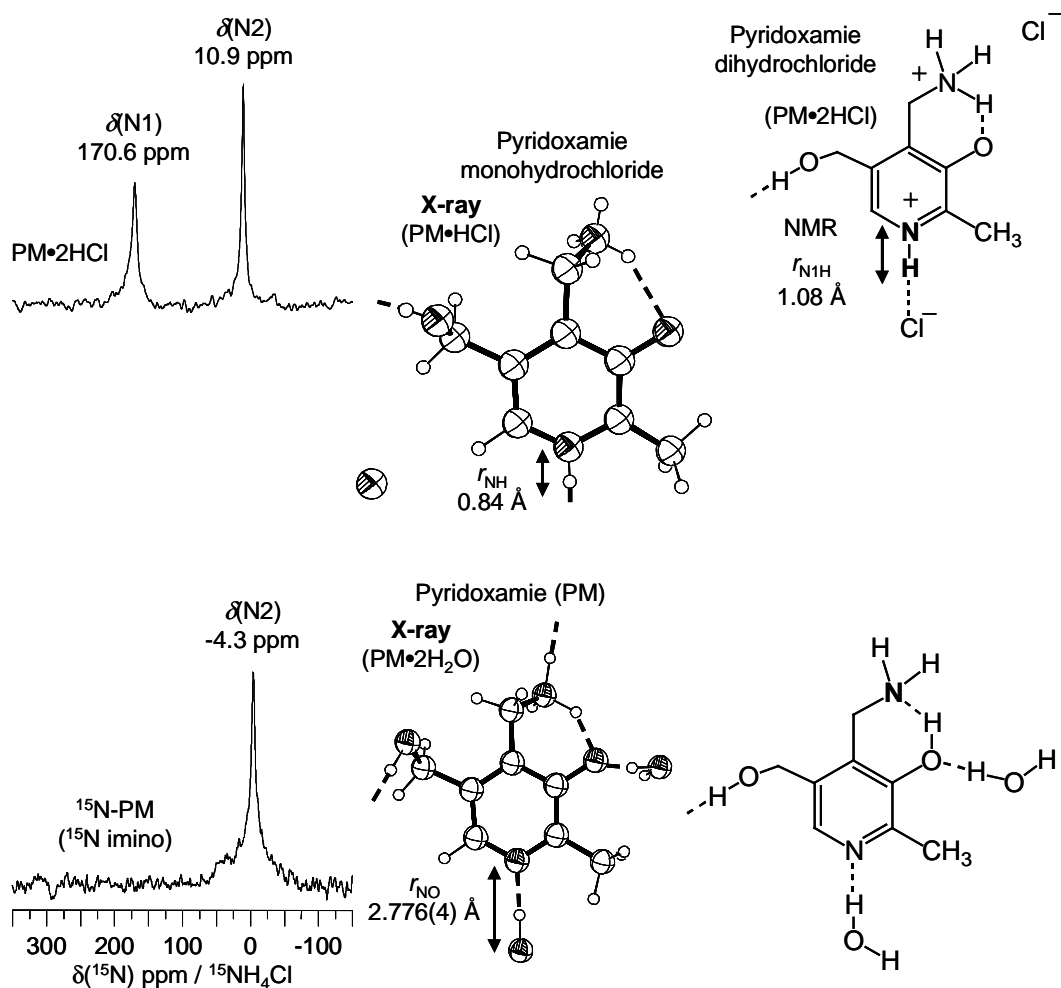

**Figure S5.**  $^{15}\text{N}\{^1\text{H}\}$  CP MAS (30.41 MHz, 6 kHz) spectra of in imino position  $^{15}\text{N}$  labeled pyridoxamine (PM) and pyridoxamine dihydrochloride (PM·2HCl) in natural abundance. For the presented crystallographic structures and values see text. We note that crystal structure is the pyridoxamine hydrochloride (PM·HCl).

*Comment.* The mono-hydrochloride of pyridoxamine (PM·HCl) was studied by *x*-ray crystallography, for which a value of  $r_{HN} = 0.84 \text{ \AA}$  was reported, but the accuracy of the crystallographic finding is questionable. Also pyridoxamine dihydrate (PM·2 H<sub>2</sub>O) was studied by *x*-ray diffraction, and a heavy atom distance of  $r_{ON} = 2.776(4) \text{ \AA}$  between the hydroxyl group of the adjacent water molecule and the pyridine ring was reported. For PM·2HCl we obtained by NMR a value of  $r_{HN} = 1.08 \text{ \AA}$  for the pyridine-HCl hydrogen bond, indicating a zwitterionic structure. We observed for the amino nitrogen a  $^{15}\text{N}$  chemical shift of 10.9 ppm, which we assign to the amino group in the protonated form, hydrogen bonded to chloride  $\text{Cl}^-$ . For neutral dihydrate of PM 2H<sub>2</sub>O, where the ammonium group is hydrogen bonded to water, a high field shift to -4.3 ppm was observed.



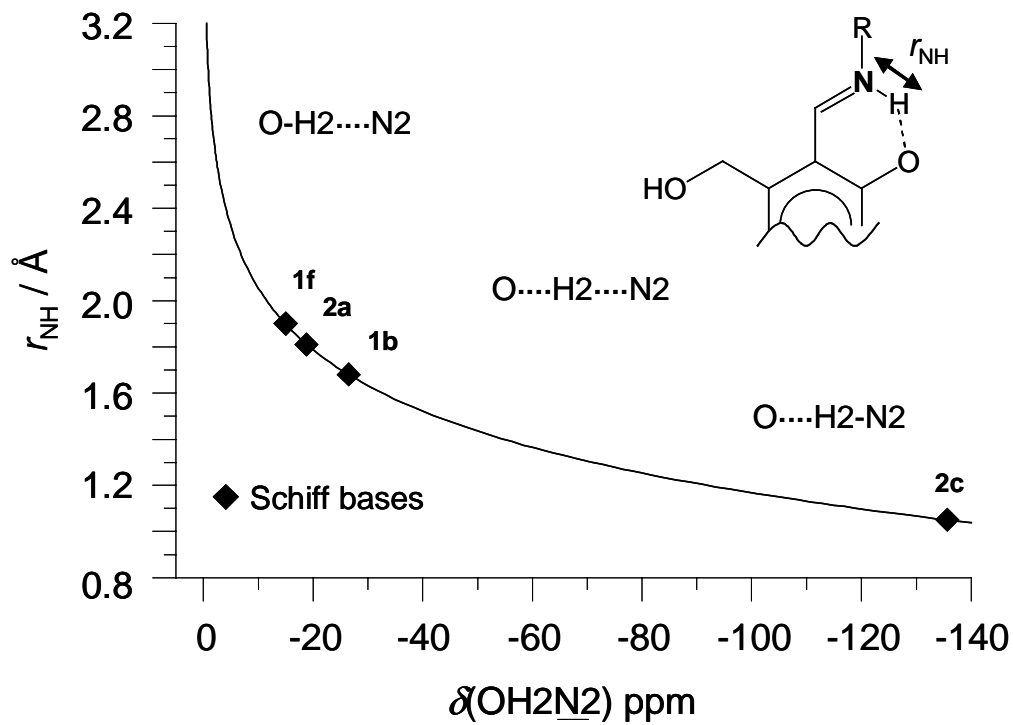

**Figure S6.** Plot of the estimated intramolecular  $r_{\text{NH}}$  distances against the intrinsic  $^{15}\text{N}$  chemical shift of the imino nitrogen in the Schiff bases **1b** and **2a** as well as their acid-base adducts **1f** and **2c**. For the calculation of the solid line see the main text.

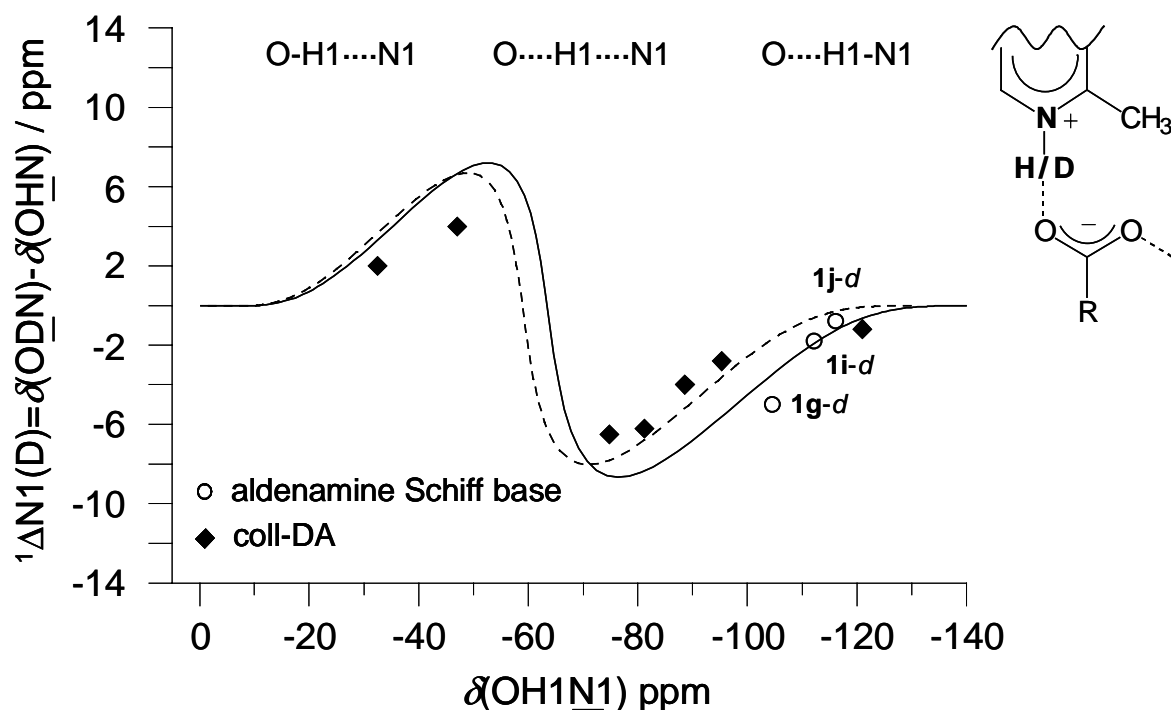

**Figure S7.** Secondary isotopic effect  ${}^1\Delta N1(D)$  vs. intrinsic  ${}^{15}\text{N}$  chemical shift of the intermolecular OH1N1 hydrogen bond. The open circles represented the aldimine Schiff base-adducts **1g-d**, **1i-d**, and **1j-d**, the solid curve correspond to this data. The filled diamonds represented the collidine-DA complexes which were obtained from literature, the dash curve correspond to this data. For further details see the main text.

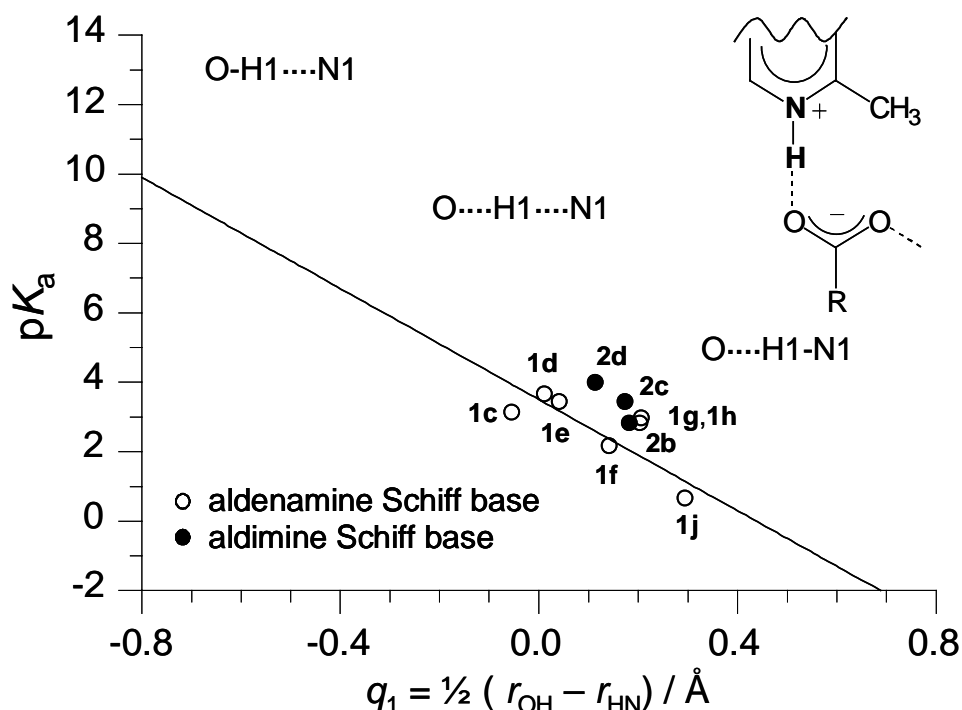

**Figure S8.**  $pK_a$  values vs. proton transfer coordinate  $q_1^H$  correlation of the acid components in the organic solids of the aldenamine Schiff base-adducts **1b** to **1j** (open circles) and aldimine Schiff base-adducts **2b** to **2e** (filled circles). The  $pK_a$  values is a function of  $q_1^H$  with the relation  $pK_a = A - B q_1^H$  by using the parameters  $A = 3.5$  and  $B = 8$ .

**Table S1.** NMR crystallographic values.<sup>a,b,c,d</sup>

|           | $pK_a$ | $\delta(\text{OH1N1})^a$<br>/ ppm | $r_{\text{NH}}^b$<br>/ Å | $r_{\text{OH}}^b$<br>/ Å | $q_1^{\text{Hc}}$<br>/ Å | $q_2^{\text{Hd}}$<br>/ Å |
|-----------|--------|-----------------------------------|--------------------------|--------------------------|--------------------------|--------------------------|
| <b>1c</b> | 3.14   | -60.2                             | 1.32                     | 1.21                     | -0.05                    | 2.53                     |
| <b>1d</b> | 3.66   | -71.6                             | 1.25                     | 1.27                     | 0.01                     | 2.52                     |
| <b>1e</b> | 3.44   | -77.0                             | 1.22                     | 1.30                     | 0.04                     | 2.52                     |
| <b>1f</b> | 2.17   | -95.1                             | 1.14                     | 1.43                     | 0.14                     | 2.57                     |
| <b>1g</b> | 2.82   | -104.6                            | 1.10                     | 1.51                     | 0.20                     | 2.62                     |
| <b>1h</b> | 2.97   | -104.9                            | 1.10                     | 1.52                     | 0.21                     | 2.62                     |
| <b>1i</b> | -7     | -112.2                            | 1.08                     | 1.60                     | 0.26                     | 2.68                     |
| <b>1j</b> | 0.66   | -116.2                            | 1.06                     | 1.65                     | 0.29                     | 2.72                     |
| <b>2b</b> | 3.99   | -90.1                             | 1.16                     | 1.39                     | 0.11                     | 2.55                     |
| <b>2c</b> | 3.44   | -100.2                            | 1.12                     | 1.47                     | 0.17                     | 2.59                     |
| <b>2d</b> | 2.82   | -101.4                            | 1.12                     | 1.48                     | 0.18                     | 2.60                     |
| <b>2e</b> | -6.65  | -118.7                            | 1.06                     | 1.69                     | 0.32                     | 2.75                     |

<sup>a</sup> Values of the pyridine nitrogen are with respect to solid **1a**, resonating at 282.5 ppm. <sup>b</sup> NMR crystallographic values are extrapolated from the experimental isotropic  $^{15}\text{N}$  chemical shifts.

<sup>b</sup>  $q_1^H = \frac{1}{2} (r_{\text{ON}} - r_{\text{NH}})$ . <sup>c</sup>  $q_2 = r_{\text{HN}} + r_{\text{OH}}$ .
